# Supplementary material for: From Childhood to Adulthood: An Attempt to Model Long-Term Outcomes of ADHD Using Machine Learning
Source: Research Square preprint supplement (doi:10.21203/rs.3.rs-8087520/v1), 2026-01-06
Supplement: Supplementary file 1 [file 8dd773c3f108003ae543e58d.pdf]

## **Supplementary material**

### **Supplementary Method 1.** *Polygenic liability scores calculation*

**Table S1.** *Comparison of successfully retained participants with childhood ADHD to the initial baseline sample*

**Table S2.** *Description of predictors and their measurement*

**Table S3.** *Description of outcomes, measures, and dependent variables*

**Fig S1.** *Overview of the pipeline within the cross-validation folds*

**Fig S2.** *Elbow plot for identification of number of clusters of functioning using K-means clustering*

**Fig S3.** *Plot of the silhouette score for identification of number of clusters of functioning using K-means*

**Table S4.** *Hyperparameter tuning*

**Table S5.** *Description of outcomes excluded from K-means clustering to identify groups with similar adult functioning*

### **Supplementary Method 1. Polygenic liability scores calculation**

Polygenic liability scores were calculated using PRS-CS [1], which leverages linkage disequilibrium (LD) structure from GWAS summary statistics to estimate posterior effect size for each variant in a Bayesian framework. Specifically, PRS-CS uses a continuous shrinkage prior to regularize noisy SNP effects, thereby improving estimation accuracy compared to traditional (P + T) approaches.

We applied a maximum of 1500 Markov Chain Monte Carlo (MCMC) iterations and set the seed of the random number generator to 42. The remaining settings were the default settings. As a reference we used the 1KG panel provided by PRS-CS. We evaluated PRS-CS performance using both the automatic shrinkage parameter estimation (PRS-CSauto) and fixed shrinkage parameters ( $\phi = 1e^{-2}, 1e^{-4}, 1e^{-6}$ ). Note that this parameter comparison was conducted within the same sample used for PRS calculation (NeuroIMAGE), which represents a form of overfitting. This analysis was performed solely to identify optimal parameter settings rather than to assess true predictive validity, which would require independent validation samples.

Based on this comparison, we found that PRS-CSauto performed best, albeit with a slim margin ( $R^2_{auto} = 0.096$ ;  $R^2_{1e-2} = 0.090$ ;  $R^2_{1e-4} = 0.090$ ;  $R^2_{1e-6} = 0.046$ ). Therefore, PRS-CSauto derived PRS were used as predictors in the present analysis.

**Table S1.***Comparison of successfully retained participants with childhood ADHD to the initial baseline sample*

|                                       | Retained<br>( <i>n</i> = 133) | Initial sample<br>( <i>n</i> = 510) | Retained versus<br>initial sample |
|---------------------------------------|-------------------------------|-------------------------------------|-----------------------------------|
| Age in years                          | 11.09 (2.79)                  | 10.95 (2.80)                        | Wald $\chi^2 = 0.26$              |
| Male, <i>n</i> (%)                    | 100 (75%)                     | 400 (78%)                           | Wald $\chi^2 = 0.75$              |
| Estimated TIQ                         | 100.74 (12.41)                | 98.88 (11.99)                       | Wald $\chi^2 = 1.67$              |
| Parental education level              | 5.24 (0.81)                   | 5.19 (0.74)                         | Wald $\chi^2 = 0.13$              |
| ADHD symptoms                         | 77.25 (9.26)                  | 75.29 (9.80)                        | Wald $\chi^2 = 4.72^*$            |
| ODD symptoms                          | 65.05 (12.30)                 | 66.09 (12.37)                       | Wald $\chi^2 = 0.01$              |
| Anxious/shy behavior                  | 57.09 (13.43)                 | 58.01 (13.74)                       | Wald $\chi^2 = 0.47$              |
| Behavioral and emotional difficulties | 18.85 (5.71)                  | 18.92 (6.18)                        | Wald $\chi^2 = 0.04$              |

*Note.* ADHD = attention-deficit/hyperactivity disorder, ODD = oppositional defiance disorder, TIQ = total intelligence quotient.

\**p* < .05.

**Table S2.***Description of predictors and their measurement*

| Predictor                                                      | Measure                                            | Dependent variable and range of possible scores                             | Description                                                                                         |
|----------------------------------------------------------------|----------------------------------------------------|-----------------------------------------------------------------------------|-----------------------------------------------------------------------------------------------------|
| <b>Domain: ADHD symptoms and treatment</b>                     |                                                    |                                                                             |                                                                                                     |
| DSM-4 hyperactive/impulsive symptoms ( <i>parent-report</i> )  | Hyperactive and impulsive module of PACS [2]       | Number of DSM-4 hyperactive/impulsive symptoms of ADHD (range = 0 – 9)      | Structured interview based on parent report assessing presence of symptoms of DSM-4 ADHD            |
| DSM-4 inattentive symptoms ( <i>parent-report</i> )            | Inattentive and disorganization module of PACS [2] | Number of DSM-4 inattentive symptoms of ADHD (range = 0 – 9)                | Structured interview based on parent report assessing presence of symptoms of DSM-4 ADHD            |
| DSM-4 hyperactive/impulsive symptoms ( <i>teacher-report</i> ) | CTRS (Long Version) [3]                            | Severity of DSM-4 hyperactive/impulsive symptoms (range = 0 - 27)           | Teacher-report questionnaire assessing DSM-related ADHD symptoms                                    |
| DSM-4 inattentive symptoms ( <i>teacher-report</i> )           | CTRS (Long Version) [3]                            | Severity of DSM-4 inattentive symptoms (range = 0 - 27)                     | Teacher-report questionnaire assessing DSM-related ADHD symptoms                                    |
| Stimulant medication                                           | Custom made question                               | Presence of stimulant medication use                                        | Parent-report question assessing use of methylphenidate, Ritalin or Concerta                        |
| <b>Domain: Other psychopathology</b>                           |                                                    |                                                                             |                                                                                                     |
| DSM-4 emotional problems                                       | Emotional problems module of PACS [2]              | Severity of DSM-4 depression and anxiety disorder symptoms (range = 0 – 48) | Structured interview based on parent report assessing presence of DSM-4 mood/anxiety symptoms       |
| Anxiety symptoms                                               | MASC [4]                                           | Severity of anxiety symptoms (range = 0 – 117)                              | Self-reported questionnaire assessing anxiety                                                       |
| DSM-4 CD symptoms                                              | CD module of PACS [2]                              | Number of DSM-4 CD symptoms of ADHD (range = 0 – 14)                        | Structured interview based on parent report assessing presence of symptoms of DSM-4 CD              |
| DSM-4 ODD symptoms                                             | ODD module of PACS [2]                             | Number of DSM-4 ODD symptoms of ADHD (range = 0 – 8)                        | Structured interview based on parent report assessing presence of symptoms of DSM-4 ODD             |
| Autistic traits                                                | CSBQ [5]                                           | Severity of autistic traits (range = 0 – 98)                                | Parent-rated questionnaire assessing autistic traits                                                |
| <b>Domain: Somatic characteristics</b>                         |                                                    |                                                                             |                                                                                                     |
| Birth weight                                                   | Custom made question                               | Birth weight (< 5 pounds - > 7 pounds)                                      | Parent report question assessing birth weight                                                       |
| CNS burden                                                     | Custom made questions                              | Presence of a CNS burden                                                    | Parent report questions assessing past presence of meningitis, hospitalization due to trauma to the |

|                                                          |                             |                                                                        |                                                                                                                                         |
|----------------------------------------------------------|-----------------------------|------------------------------------------------------------------------|-----------------------------------------------------------------------------------------------------------------------------------------|
|                                                          |                             |                                                                        | skull/concussion, and presence of epilepsy                                                                                              |
| <b>Domain: Cognition</b>                                 |                             |                                                                        |                                                                                                                                         |
| Estimated TIQ                                            | WISC-III or WAIS-III [6, 7] | Estimated Total IQ (range = 50 - 135)                                  | Four-subtest short form to estimate total IQ.                                                                                           |
| <b>Domain: ADHD PRS</b>                                  |                             |                                                                        |                                                                                                                                         |
| ADHD PRS                                                 | PRS                         | Genetic risk of ADHD                                                   | Genetic risk score based on risk alleles identified in the most recent ADHD GWAS[8]                                                     |
| <b>Domain: Parental demographics and psychopathology</b> |                             |                                                                        |                                                                                                                                         |
| Parental age at birth                                    | Custom made question        | Mean age of parents at birth of child                                  | Parental age at time of birth of child                                                                                                  |
| Parental educational level <sup>a</sup>                  | Dutch Verhage scale [9]     | Dutch Verhage score (range = 1 – 7)                                    | Classification of highest level of completed education level based on the Dutch Verhage categories.                                     |
| Maternal ADHD                                            | Custom made questions       | Severity of maternal DSM-4 ADHD symptoms in adulthood (range = 0 – 69) | Maternal-report questionnaire assessing their own DSM-4 ADHD symptoms in adulthood                                                      |
| Paternal ADHD                                            | Custom made questions       | Severity of parental DSM-4 ADHD symptoms in adulthood (range = 0 – 69) | Paternal-report questionnaire assessing their own DSM-4 ADHD symptoms in adulthood                                                      |
| Parental substance use                                   | Custom made questions       | Presence of parental substance use                                     | Parental-report questions assessing their own use of cigarettes (> 5 per day), alcohol (> 5 units per day), cocaine, ecstasy, or heroin |

<sup>a</sup> Parental educational level based on the was based on the assessment in wave II as this was not assessed at wave I, assuming these levels did not differ between waves I and II (wave II was 5.60 years after wave I).

ADHD = attention-deficit/hyperactivity disorder, CD = conduct disorder, CNS = central nervous system, CSBQ = children's social behavior questionnaire, CTRS = conners' parent rating scale, DCDQ = developmental coordination disorder questionnaire, DSM = diagnostic and statistical manual of mental disorders, MASC = multidimensional anxiety scale for children, ODD = oppositional defiant disorder, PACS = parental account of children's symptoms, PRS = polygenic risk score, TIQ = total intelligence quotient, WAIS = Wechsler adult intelligence scale, WISC = Wechsler intelligence scale for children.

**Table S3.***Description of outcomes, measures, and dependent variables*

| Outcome                                                  | Measure                                           | Dependent variable and range of possible scores                                                                                                   | Description <sup>a</sup>                                                                                                                                                                                | Assessment part      |
|----------------------------------------------------------|---------------------------------------------------|---------------------------------------------------------------------------------------------------------------------------------------------------|---------------------------------------------------------------------------------------------------------------------------------------------------------------------------------------------------------|----------------------|
| <b>Outcome domain: Psychiatric status</b>                |                                                   |                                                                                                                                                   |                                                                                                                                                                                                         |                      |
| DSM-5 ADHD                                               | ADHD module of SCID-5 Disorders [10, 11]          | Presence of DSM-5 ADHD                                                                                                                            | Structured interview assessing number of symptoms and presence of DSM 5 ADHD                                                                                                                            | Video call 1         |
| DSM-5 MDD                                                | Depression module of SCID-5 Disorders [10, 11]    | Presence of DSM-5 depression                                                                                                                      | Structured interview assessing number of symptoms and presence of DSM 5 depression                                                                                                                      | Video call 1         |
| DSM-5 anxiety disorder                                   | Anxiety module of SCID-5 Disorders [10, 11]       | Presence of any of the DSM-5 anxiety disorders (i.e., either panic disorder, agoraphobia, social anxiety disorder, specific disorder, and/or GAD) | Structured interview assessing number of symptoms and presence of any of the DSM-5 anxiety disorders (i.e., either panic disorder, agoraphobia, social anxiety disorder, specific disorder, and/or GAD) | Video call 1         |
| DSM-5 ASPD                                               | ASPD module of SCID-5 Disorders [10, 11]          | Presence of DSM-5 ASPD                                                                                                                            | Structured interview assessing number of symptoms and presence of DSM 5 ASPD                                                                                                                            | Video call 1         |
| DSM-5 any SUD                                            | SUD module of SCID-5 Disorders [10, 11]           | Presence of any of the DSM-5 AUD and/or drug use disorders                                                                                        | Structured interview assessing number of symptoms and presence of any of the DSM-5 AUD and/or drug use disorders                                                                                        | Video call 1         |
| <b>Outcome domain: Behavioral and Emotional problems</b> |                                                   |                                                                                                                                                   |                                                                                                                                                                                                         |                      |
| Severity of ADHD symptoms - self report                  | CAARS [12]                                        | ADHD index score (range: 0 – 36)                                                                                                                  | Self-report questionnaire assessing severity of DSM-related ADHD symptoms                                                                                                                               | Online questionnaire |
| Severity of ADHD symptoms - other report <sup>b</sup>    | CAARS [12]                                        | Other-reported ADHD index score (range: 0 – 36)                                                                                                   | Other-report questionnaire assessing severity of DSM-related ADHD symptoms                                                                                                                              | Online questionnaire |
| Externalizing problems                                   | Externalizing problems subscale of ASEBA-ASR [13] | Externalizing problems score (range = 0 – 70)                                                                                                     | Self-report questionnaire assessing aggressive, rule-breaking behavior, and intrusive behavior/problems                                                                                                 | Online questionnaire |

|                                                              |                                                   |                                                             |                                                                                                                   |                      |
|--------------------------------------------------------------|---------------------------------------------------|-------------------------------------------------------------|-------------------------------------------------------------------------------------------------------------------|----------------------|
| Internalizing problems                                       | Internalizing problems subscale of ASBEA-ASR [13] | Internalizing problems score (range = 0 – 78)               | Self-report questionnaire assessing somatic complaints, anxious/depressed and withdrawn behavior/problems         | Online questionnaire |
| Autistic traits <sup>b</sup>                                 | ASBQ [14]                                         | Other-reported autistic traits total score (range = 0 – 98) | Other-report questionnaire assessing autistic traits                                                              | Online questionnaire |
| Mood dysregulation                                           | ARI [15]                                          | Mood dysregulation total score (range = 0 – 12)             | Self-report questionnaire assessing irritability as a measure of mood dysregulation                               | Online questionnaire |
| Callous and unemotional traits                               | ICU [16]                                          | Callous and unemotional traits total score (range = 0 – 72) | Self-report questionnaire assessing callous and unemotional traits                                                | Online questionnaire |
| Rule-breaking                                                | Rule-breaking subscale of STAB [17]               | Rule-breaking score (range = 0 – 44)                        | Self-report questionnaire assessing rule breaking behavior                                                        | Online questionnaire |
| Physical aggression                                          | Physical aggression subscale of STAB [17]         | Physical aggression score (range = 0 – 40)                  | Self-report questionnaire assessing direct/physical aggressive behavior                                           | Online questionnaire |
| Social aggression                                            | Social aggression subscale of STAB [17]           | Social aggression score (range = 0 – 44)                    | Self-report questionnaire assessing indirect/social aggressive behavior                                           | Online questionnaire |
| Tobacco use severity                                         | Tobacco use items of the ASSIST-Lite [18]         | Tobacco use severity score (range = 0 – 30)                 | Self-report questionnaire assessing tobacco use problems                                                          | Video call 2         |
| Alcohol use severity                                         | Alcohol use items of the ASSIST-Lite [18]         | Alcohol use severity score (range = 0 – 36)                 | Self-report questionnaire assessing alcohol use problems                                                          | Video call 2         |
| Drug use severity                                            | Drug use items of the ASSIST-Lite [18]            | Drug use severity score (range = 0 – 36)                    | Self-report questionnaire assessing drug use problems                                                             | Video call 2         |
| Game addiction scale                                         | GAS [19]                                          | Game addiction scale total score (range = 0 – 21)           | Self-report questionnaire assessing for addictive game use                                                        | Video call 2         |
| <b>Outcome domain: Academic and Professional functioning</b> |                                                   |                                                             |                                                                                                                   |                      |
| Educational level                                            | Dutch Verhage scale [9]                           | Dutch Verhage score (range = 1 – 7)                         | Classification of highest level of completed education level based on the Dutch Verhage categories. Higher scores | Online questionnaire |

|                                             |                                                |                                                               |                                                                                                                                                                      |                      |
|---------------------------------------------|------------------------------------------------|---------------------------------------------------------------|----------------------------------------------------------------------------------------------------------------------------------------------------------------------|----------------------|
| Repeated grade                              | Custom made question                           | Ever repeated a grade (yes/no)                                | indicate a higher level of completed education<br>Self-report question assessing if a school year ever was repeated                                                  | Online questionnaire |
| Employed                                    | Custom made question                           | Currently employed (yes/no)                                   | Self-report question assessing current (un)employment                                                                                                                | Online questionnaire |
| Number of times switched jobs               | Custom made question                           | Number of times switched jobs                                 | Self-report question assessing how often jobs were switched                                                                                                          | Online questionnaire |
| <b>Outcome domain: Adaptive functioning</b> |                                                |                                                               |                                                                                                                                                                      |                      |
| Perceived stress                            | PSS [20]                                       | Perceived stress total score (range 0 – 40)                   | Self-report questionnaire assessing perception of stress during the last month                                                                                       | Video call 2         |
| Risk-taking                                 | Risk-taking subscale of DOSPERT [21, 22]       | Risk-taking total score (range = 30 – 210)                    | Self-report questionnaire assessing general and domain-specific risk preference                                                                                      | Online questionnaire |
| Risk perception                             | Risk-perception subscale of DOSPERT [21, 22]   | Risk perception total score (range = 30 – 210)                | Self-report questionnaire assessing perception of general and domain-specific risk                                                                                   | Online questionnaire |
| Emotional wellbeing                         | Emotional wellbeing subscale of SF-36 [23, 24] | Emotional wellbeing scale score (range = 0 – 100)             | Self-report questionnaire assessing general mental health. Higher scores indicate a more favorable health state                                                      | Online questionnaire |
| Social functioning                          | Social functioning subscale of SF-36 [23, 24]  | Social functioning scale score (range = 0 – 100)              | Self-report questionnaire assessing limitations in social activities because of physical or emotional problems. Higher scores indicate a more favorable health state | Online questionnaire |
| Quality of life - relationships             | Relationships subscale of AAQoL [25]           | Quality of life - relationships scale score (range = 0 – 100) | Self-report questionnaire assessing quality of life regarding relationships. Higher scores indicate a more favorable level of quality of life                        | Online questionnaire |
| Quality of life - life outlook              | Life outlook subscale of AAQoL [25]            | Quality of life - life outlook scale                          | Self-report questionnaire assessing quality of                                                                                                                       | Online questionnaire |

|                                                   |                                                       |                                                          |                                                                                                                                                                                      |                      |
|---------------------------------------------------|-------------------------------------------------------|----------------------------------------------------------|--------------------------------------------------------------------------------------------------------------------------------------------------------------------------------------|----------------------|
|                                                   |                                                       | score (range = 0 – 100)                                  | life regarding life outlook. Higher scores indicate a more favorable level of quality of life                                                                                        |                      |
| <b>Outcome domain: Neurocognitive functioning</b> |                                                       |                                                          |                                                                                                                                                                                      |                      |
| Estimated Total IQ                                | WAIS-IV [26-28]                                       | Estimated Total IQ (range = 50 - 135)                    | Two-subtest short form to estimate total IQ. Higher scores indicate a higher total IQ                                                                                                | Video call 2         |
| <b>Outcome domain: Physical health</b>            |                                                       |                                                          |                                                                                                                                                                                      |                      |
| BMI                                               | Height and weight                                     | BMI (range = 0 – ∞)                                      | Height (in cm) and weight (in kg) based calculation of BMI                                                                                                                           | Online questionnaire |
| MET minutes per week                              | IPAQ [29]                                             | MET minutes per week (range = 0 – 19278)                 | Self-report questionnaire assessing physical activity of the last week based on length, frequency, and intensity of physical activity. Higher scores indicate more physical activity | Video call 2         |
| General health perceptions                        | General health perceptions subscale of SF-36 [23, 24] | General health perceptions scale score (range = 0 – 100) | Self-report questionnaire assessing general health perceptions. Higher scores indicate a more favorable health state                                                                 | Online questionnaire |
| Physical functioning                              | Physical functioning subscale of SF-36 [23, 24]       | Physical functioning scale score (range = 0 – 100)       | Self-report questionnaire assessing limitations in physical activities because of health problems. Higher scores indicate a more favorable health state                              | Online questionnaire |
| Pain                                              | Pain subscale of SF-36 [23, 24]                       | Pain scale score (range = 0 – 100)                       | Self-report questionnaire assessing bodily pain. Higher scores indicate a more favorable health state                                                                                | Online questionnaire |
| Energy/vitality                                   | Energy/vitality subscale of SF-36 [23, 24]            | Energy/vitality scale score (range = 0 – 100)            | Self-report questionnaire assessing vitality, energy, and fatigue. Higher scores indicate a more                                                                                     | Online questionnaire |

|                                                                                         |                                                                                              |                                                                                                              |                                                                                                                                                                                                              |                      |
|-----------------------------------------------------------------------------------------|----------------------------------------------------------------------------------------------|--------------------------------------------------------------------------------------------------------------|--------------------------------------------------------------------------------------------------------------------------------------------------------------------------------------------------------------|----------------------|
| Sleep quality                                                                           | PSQI [30]                                                                                    | Sleep quality score (range = 0 – 21)                                                                         | favorable health state<br>Self-report questionnaire assessing sleep quality during the last month                                                                                                            | Video call 2         |
| Diet                                                                                    | Diet                                                                                         | Healthy diet score (range = 0 – 10)                                                                          | Two self-report questions assessing diet healthiness and diet adherence based on the recommendations of The Netherlands Nutrition Centre on a visual analogue scale. Higher scores indicate a healthier diet | Online questionnaire |
| <b>Outcome domain: Healthcare service use</b>                                           |                                                                                              |                                                                                                              |                                                                                                                                                                                                              |                      |
| Healthcare service use - health and safety doctors and/or the employee insurance agency | Number of visits to health and safety doctors and/or the employee insurance agency last year | Number of visits to health and safety doctors and/or the employee insurance agency last year (range = 0 - ∞) | Questionnaire assessing number of visits to health and safety service and/or employee insurance agency institutes during the last year                                                                       | Online questionnaire |
| Healthcare service use - mental healthcare institutes                                   | Number of visits to mental health institutes last year                                       | Number of visits to mental healthcare institutes last year (range = 0 - ∞)                                   | Questionnaire assessing number of visits to mental healthcare institutes                                                                                                                                     | Online questionnaire |
| Healthcare service use - physical healthcare institutes                                 | Number of visits to physical healthcare institutes last year                                 | Number of visits to physical healthcare institutes last year (range = 0 - ∞)                                 | Questionnaire assessing number of visits to 41 various physical health institutes                                                                                                                            | Online questionnaire |

*Note.* This Table was adapted from van der Plas et al.[31].

<sup>a</sup> The description includes score interpretation only when a higher score does not reflect worse functioning.

<sup>b</sup> Other-reporter preferably was the partner, otherwise someone else who knew them well (e.g., parents or siblings).

AAQoL= adult ADHD quality of life questionnaire, ADHD = attention-deficit/hyperactivity disorder, ASBQ = adult social behavior questionnaire, ASEBA-ASR = Achenbach system of empirically based assessment adult self report, ASPD = antisocial personality disorder, ARI = affective reactivity index, ASSIST-lite = alcohol, smoking and substance involvement screening tool – lite, AUD = alcohol use disorder, BMI = body mass index, CAARS = conners adult ADHD rating scale, DOSPERT = domain specific risk-taking questionnaire, DSM-5 = diagnostic and statistical manual of mental disorders fifth edition, GAD = generalized anxiety disorder, GAS = game addiction scale, ICU = inventory of callous and unemotional traits, IPAQ = international physical activity questionnaire, IQ = intelligence quotient, MDD = major depressive disorder, MET = metabolic equivalent, PSS

= perceived stress scale, PSQI = Pittsburgh sleep quality index, SCID-5 = structured clinical interview for DSM-5, SF-36 = short form health survey, STAB = subtypes of antisocial behavior questionnaire, SUD = substance use disorder, WAIS-IV = Wechsler adult intelligence scale.

**Fig S1.**

*Overview of the pipeline within the cross-validation folds*

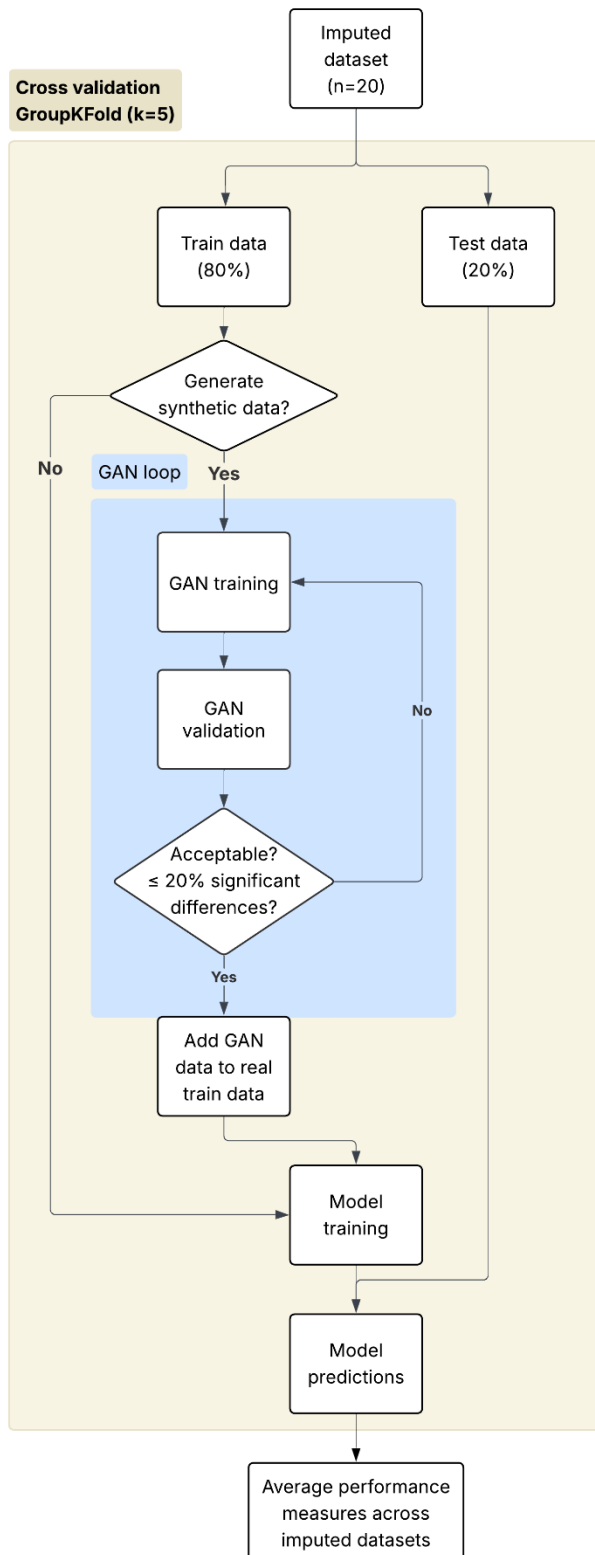

*Note.* All models were trained both on a dataset including only real data and on a dataset including real and synthetic (GAN) data.

GAN = generative adversarial network.

**Fig S2.**

*Elbow plot for identification of number of clusters of functioning using K-means clustering*

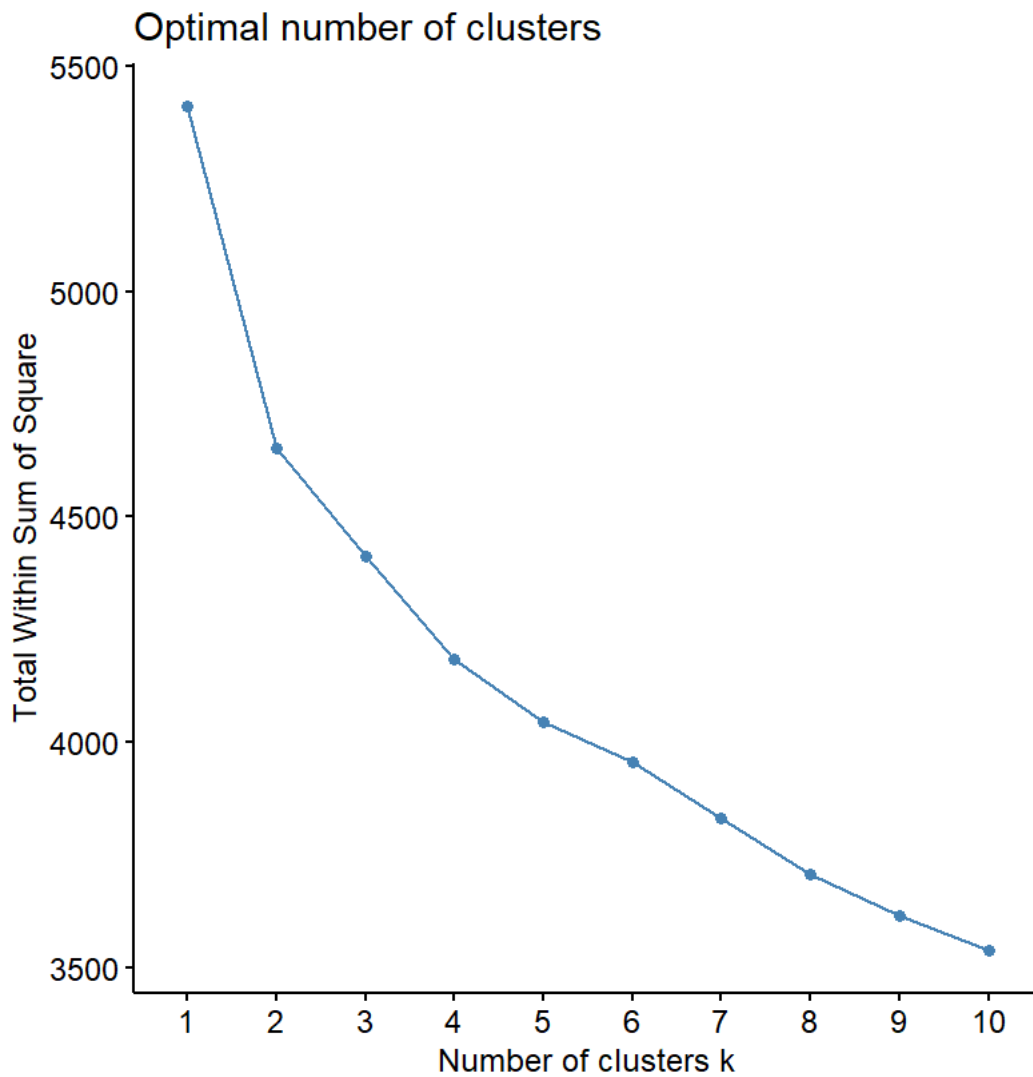

*Note.* The elbow plot identified  $k = 2$  as optimal number of clusters of functioning based on 41 outcome measures.

**Fig S3.**

*Plot of the silhouette score for identification of number of clusters of functioning using K-means*

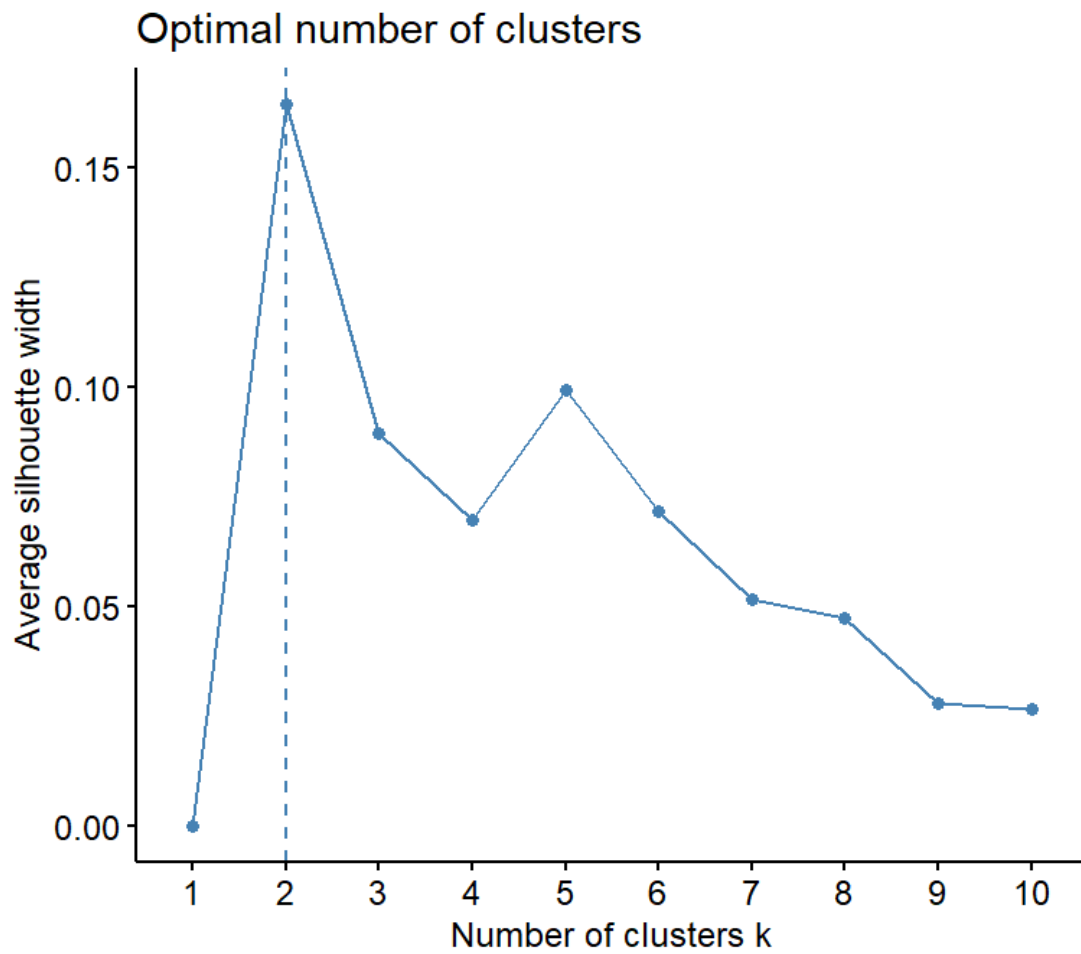

*Note.* The silhouette score identified  $k = 2$  as optimal number of clusters of functioning based on 41 outcome measures.

**Table S4.***Hyperparameter tuning*

| Model                                         | Hyperparameters grid search                                                            |
|-----------------------------------------------|----------------------------------------------------------------------------------------|
| Logistic regression with ridge regularization | C (0.001, 0.01, 0.1, 1, 10, 100)<br>solver (lbfgs)                                     |
| Support vector machine                        | C = (0.1, 1.0, 10)<br>kernel = (rbf, linear)                                           |
| Random forest                                 | n_estimators = (100, 200, 300}<br>max_depth = (5, 10, 15}                              |
| Extreme gradient boosting                     | n_estimators = (50, 100)<br>max_depth = (3, 6, 10)<br>learning_rate = (0.01, 0.1, 0.3) |

**Table S5.***Description of outcomes excluded from K-means clustering to identify groups with similar adult functioning*

| Outcome                                        | Measure                                   | Description                                                                                                                                                                         | Reason for exclusion                                                                                                                   |
|------------------------------------------------|-------------------------------------------|-------------------------------------------------------------------------------------------------------------------------------------------------------------------------------------|----------------------------------------------------------------------------------------------------------------------------------------|
| <b>Demographics</b>                            |                                           |                                                                                                                                                                                     |                                                                                                                                        |
| Age                                            | Age                                       | Self-reported question                                                                                                                                                              | No long-term outcome of ADHD                                                                                                           |
| Family status                                  | Family status                             | Self-reported question                                                                                                                                                              | Measure is dependent on age (e.g., single at age 20 is not a negative outcome, whereas it might indicate a negative outcome at age 35) |
| Number of children                             | Number of children                        | Self-reported question                                                                                                                                                              | Measure is dependent on age                                                                                                            |
| Gender                                         | TMF [32]                                  | Self-report questionnaire assessing self perceived masculinity/femininity                                                                                                           | No long-term outcome of ADHD, but a stable or predictive measure                                                                       |
| <b>Adaptive functioning</b>                    |                                           |                                                                                                                                                                                     |                                                                                                                                        |
| Number of significant life events after age 16 | Long-term Difficulties Questionnaire [33] | Self-report questionnaire assessing number of significant life events after age 16                                                                                                  | No long-term outcome of ADHD, but a stable or predictive measure                                                                       |
| Creativity                                     | CAQ [34]                                  | Self-report questionnaire assessing presence of 10 domains of creative achievements                                                                                                 | No long-term outcome of ADHD, but a stable or predictive measure                                                                       |
| <b>Neurocognitive functioning</b>              |                                           |                                                                                                                                                                                     |                                                                                                                                        |
| Short-term memory – digits                     | WAIS-IV [26, 35]                          | Total raw score of the Digit Span Forwards subtask from the Digit Span module. Higher scores indicate a better short-term memory                                                    | No long-term outcome of ADHD, but a stable or predictive measure                                                                       |
| Short-term memory – verbal                     | 15WT [36]                                 | Test assessing short-term memory, based on total number of correct short-term retention with 15 auditory presented words 5 times. Higher scores indicate a better short-term memory | No long-term outcome of ADHD, but a stable or predictive measure                                                                       |
| Working memory                                 | WAIS-IV [26, 35]                          | Raw score of the Digit Backwards and Digit Span Sequencing subtask from the Digit Span module. Higher scores indicate a better working memory                                       | No long-term outcome of ADHD, but a stable or predictive measure                                                                       |
| Long-term memory                               | 15WT [36]                                 | Test assessing long-term memory, based on total number of correct words retained after 20                                                                                           | No long-term outcome of ADHD, but a stable or predictive measure                                                                       |

|                                           |                                                                      |                                                                                                                                                                    |                                                                                                     |
|-------------------------------------------|----------------------------------------------------------------------|--------------------------------------------------------------------------------------------------------------------------------------------------------------------|-----------------------------------------------------------------------------------------------------|
|                                           |                                                                      | minutes. Higher scores indicate a better long-term memory                                                                                                          |                                                                                                     |
| Cognitive fluency                         | Dutch version of the COWAT [37]                                      | Test assessing letter fluency, based on total number of correct words produced across 3 letters (D, A, T). Higher scores indicate better letter fluency            | No long-term outcome of ADHD, but a stable or predictive measure                                    |
| <b>Physical health</b>                    |                                                                      |                                                                                                                                                                    |                                                                                                     |
| Role limitation due to physical problems  | Role limitation due to physical problems subscale of SF-36 [23, 24]  | Self-report questionnaire assessing limitations in usual role activities because of physical health problems. Higher scores indicate a more favorable health state | No variance in the responses                                                                        |
| Role limitation due to emotional problems | Role limitation due to emotional problems subscale of SF-36 [23, 24] | Self-report questionnaire assessing limitations in usual role activities because of emotional problems. Higher scores indicate a more favorable health state       | No variance in the responses                                                                        |
| <b>Healthcare service use</b>             |                                                                      |                                                                                                                                                                    |                                                                                                     |
| Current ADHD medication use               | Pharmacy dispensing records                                          | Based on the presence of at least one prescription of dexamphetamine, methylphenidate, or atomoxetine in the previous year                                         | Missing for > 20% of participants                                                                   |
| Current general medication use            | Pharmacy dispensing records                                          | Based on summing the total number of different ATC codes prescribed in the previous year                                                                           | Missing for > 20% of participants                                                                   |
| <b>Other</b>                              |                                                                      |                                                                                                                                                                    |                                                                                                     |
| Coping through religion                   | Coping through religion                                              | Self-report questionnaire assessing perceived support from religion and religious communities.                                                                     | Missing data, as it was assessed in a subset of participants: those who belong to a religious group |
| Use of effective disciplinary practices   | PPI [38-40]                                                          | Self-report questionnaire for parents assessing parents' use of effective disciplinary practices.                                                                  | Missing data, as it was assessed in a subset of participants: participants with children.           |
| Use of positive parenting                 | PPI [38-40]                                                          | Self-report questionnaire for parents assessing parents' use of positive disciplinary practices.                                                                   | Missing data, as it was assessed in a subset of participants: participants with children.           |

Use of harsh  
discipline

PPI [38-40]

Self-report  
questionnaire for  
parents assessing  
parents' use of harsh  
disciplinary practices

Missing data, as it was assessed in a  
subset of participants: participants with  
children.

---

ATC = anatomical therapeutic chemical, CAQ = creative achievement questionnaire, COWAT = controlled oral word association test, PPI = parenting practice interview, SF-36 = short form health survey, WAIS-IV = Wechsler adult intelligence scale, 15T = Dutch verbal learning test.

## References

- [1] T. Ge, C.-Y. Chen, Y. Ni, Y.-C. A. Feng, and J. W. Smoller, "Polygenic prediction via Bayesian regression and continuous shrinkage priors," *Nature communications*, vol. 10, no. 1, p. 1776, 2019.
- [2] W. Chen and E. Taylor, "Parental account of children's symptoms (PACS), ADHD phenotypes and its application to molecular genetic studies," *Attention-deficit/hyperactivity disorder and the hyperkinetic syndrome: Current ideas and ways forward*, vol. 1, pp. 3-20, 2006.
- [3] C. K. Conners, "Rating Scales in Attention-Deficit/Hyperactivity Disorder: Use in Assessment and Treatment Monitoring," *J. Clin. Psychiatry*, vol. 59, 7, pp. 24-30, 1996.
- [4] J. S. March, J. D. Parker, K. Sullivan, P. Stallings, and C. K. Conners, "The Multidimensional Anxiety Scale for Children (MASC): factor structure, reliability, and validity," *J. Am. Acad. Child Adolesc. Psychiatry*, vol. 36, no. 4, pp. 554-65, Apr 1997, doi: 10.1097/00004583-199704000-00019.
- [5] C. A. Hartman, E. Luteijn, M. Serra, and R. Minderaa, "Refinement of the Children's Social Behavior Questionnaire (CSBQ): an instrument that describes the diverse problems seen in milder forms of PDD," *J. Autism Dev. Disord.*, vol. 36, no. 3, pp. 325-42, Apr 2006, doi: 10.1007/s10803-005-0072-z.
- [6] D. Wechsler, "WAIS-III Nederlandstalige bewerking Technische Handleiding", ed: London: The Psychological Corporation, 2000.
- [7] D. Wechsler, "WISC-III Handleiding", ed: London: The Psychological Corporation, 2002.
- [8] D. Demontis *et al.*, "Genome-wide analyses of ADHD identify 27 risk loci, refine the genetic architecture and implicate several cognitive domains," *Nat. Genet.*, vol. 55, no. 2, pp. 198-208, 2023.
- [9] F. Verhage, *Intelligentie en leeftijd : onderzoek bij Nederlanders van twaalf tot zevenenzeventig jaar* (Bijdragen tot de psychologie). Van Gorcum, 1964.
- [10] A. Arntz, J. Kamphuis, and J. Derks, "SCID-5-P: Gestructureerd klinisch interview voor DSM-5 Persoonlijkheidsstoornissen: Nederlandse vertaling van Structured Clinical Interview for DSM-5® Personality Disorders (SCID-5-PD) en User's Guide for the Structured Clinical Interview for DSM-5 Personality Disorders (SCID-5-PD)," 2017.
- [11] A. Arntz, J. H. Kamphuis, and J. L. & Derks, "SCID-5-S: Gestructureerd klinisch interview voor DSM-5 Syndroomstoornissen: Nederlandse vertaling van Structured Clinical Interview for DSM-5 Disorders-Clinician Version (SCID-5-CV) en User's Guide for the Structured Clinical Interview for DSM-5 Disorders-Clinician Version en delen van Structured Clinical Interview for DSM-5 Disorders-Research Version (SCID-5-RV)." 2018.
- [12] C. K. Conners, D. Erhardt, J. N. Epstein, J. D. A. Parker, G. Sitarenios, and E. Sparrow, "Self-ratings of ADHD symptoms in adults I: Factor structure and normative data," *Journal of Attention Disorders*, vol. 3, no. 3, pp. 141-151, 1999.
- [13] L. A. Rescorla and T. M. Achenbach, "The Achenbach System of Empirically Based Assessment (ASEBA) for Ages 18 to 90 Years," in *The use of psychological testing for treatment planning and outcomes assessment: Instruments for adults, Volume 3, 3rd ed.* Mahwah, NJ, US: Lawrence Erlbaum Associates Publishers, 2004, pp. 115-152.
- [14] E. H. Horwitz *et al.*, "Clinical assessment of ASD in adults using self- and other-report: Psychometric properties and validity of the Adult Social Behavior Questionnaire (ASBQ)," *Res. Autism Spectr. Disord.*, vol. 24, pp. 17-28, 2016, doi: 10.1016/j.rasd.2016.01.003.
- [15] A. Stringaris *et al.*, "The Affective Reactivity Index: a concise irritability scale for clinical and research settings," *J. Child Psychol. Psychiatry*, vol. 53, no. 11, pp. 1109-17, Nov 2012, doi: 10.1111/j.1469-7610.2012.02561.x.
- [16] E. R. Kimonis *et al.*, "Assessing callous-unemotional traits in adolescent offenders: validation of the Inventory of Callous-Unemotional Traits," *Int. J. Law Psychiatry*, vol. 31, no. 3, pp. 241-52, Jun-Jul 2008, doi: 10.1016/j.ijlp.2008.04.002.
- [17] S. A. Burt and M. B. Donnellan, "Development and validation of the Subtypes of Antisocial Behavior Questionnaire," *Aggress Behav*, vol. 35, no. 5, pp. 376-98, Sep-Oct 2009, doi: 10.1002/ab.20314.
- [18] R. Ali, S. Meena, B. Eastwood, I. Richards, and J. Marsden, "Ultra-rapid screening for substance-use disorders: the Alcohol, Smoking and Substance Involvement Screening Test (ASSIST-Lite)," *Drug Alcohol Depend.*, vol. 132, no. 1-2, pp. 352-61, Sep 1 2013, doi: 10.1016/j.drugalcdep.2013.03.001.
- [19] J. S. Lemmens, P. M. Valkenburg, and J. Peter, "Development and Validation of a Game Addiction Scale for Adolescents," *Media Psychol.*, vol. 12, no. 1, pp. 77-95, 2009, doi: 10.1080/15213260802669458.
- [20] S. Cohen, T. Kamarck, and R. Mermelstein, "Perceived Stress Scale," *Measuring stress: A guide for health and social scientists*, vol. 10, no. 2, pp. 1-2, 1994, doi: doi.org/10.1093/oso/9780195086416.001.0001.

- [21] A.-R. Blais and E. U. Weber, "A Domain-Specific Risk-Taking (DOSPERT) scale for adult populations," *Judgment and Decision Making*, vol. 1, no. 1, pp. 33-47, 2023, doi: 10.1017/s1930297500000334.
- [22] Y. Shou and J. Olney, "Assessing a domain-specific risk-taking construct: A meta-analysis of reliability of the DOSPERT scale," *Judgment and Decision Making*, vol. 15, no. 1, pp. 112-134, 2023, doi: 10.1017/s193029750000694x.
- [23] N. K. Aaronson *et al.*, "Translation, Validation, and Norming of the Dutch Language Version of the SF-36 Health Survey in Community and Chronic Disease Populations," *Journal of Clinical Epidemiology*, vol. 51, no. 11, pp. 1055-1068, 1998.
- [24] J. E. Ware, Jr. and C. D. Sherbourne, "The MOS 36-item short-form health survey (SF-36). I. Conceptual framework and item selection," *Med. Care*, vol. 30, no. 6, pp. 473-83, Jun 1992, doi: <https://www.jstor.org/stable/3765916>.
- [25] M. Brod, L. A. Adler, S. Lipsius, Y. Tanaka, A. N. Heinloth, and H. Upadhyaya, "Validation of the adult attention-deficit/hyperactivity disorder quality-of-life scale in European patients: comparison with patients from the USA," *Atten Defic Hyperact Disord*, vol. 7, no. 2, pp. 141-50, Jun 2015, doi: 10.1007/s12402-014-0160-z.
- [26] D. Wechsler. *Wechsler Adult Intelligence Scale—Fourth Edition-Nederlandse bewerking*, Pearson Assessment and Information BV.
- [27] D. A. Denney, W. K. Ringe, and L. H. Lacritz, "Dyadic Short Forms of the Wechsler Adult Intelligence Scale-IV," *Arch. Clin. Neuropsychol.*, vol. 30, no. 5, pp. 404-12, Aug 2015, doi: 10.1093/arclin/acv035.
- [28] T. A. Girard, B. N. Axelrod, R. Patel, and J. R. Crawford, "Wechsler Adult Intelligence Scale-IV Dyads for Estimating Global Intelligence," *Assessment*, vol. 22, no. 4, pp. 441-8, Aug 2015, doi: 10.1177/1073191114551551.
- [29] C. L. Craig *et al.*, "International physical activity questionnaire: 12-country reliability and validity," *Med. Sci. Sports Exerc.*, vol. 35, no. 8, pp. 1381-95, Aug 2003, doi: 10.1249/01.MSS.0000078924.61453.FB.
- [30] D. J. Buysse, C. F. Reynolds, 3rd, T. H. Monk, S. R. Berman, and D. J. Kupfer, "The Pittsburgh Sleep Quality Index: a new instrument for psychiatric practice and research," *Psychiatry Res.*, vol. 28, no. 2, pp. 193-213, May 1989, doi: 10.1016/0165-1781(89)90047-4.
- [31] N. E. van der Plas, S. D. S. Noordermeer, J. Oosterlaan, and M. Luman, "Systematic Review and Meta-Analysis: Predictors of Adult Psychiatric Outcomes of Childhood Attention-Deficit/Hyperactivity Disorder," *J. Am. Acad. Child Adolesc. Psychiatry*, Apr 24 2025, doi: 10.1016/j.jaac.2025.04.012.
- [32] S. Kachel, M. C. Steffens, and C. Niedlich, "Traditional Masculinity and Femininity: Validation of a New Scale Assessing Gender Roles," *Front. Psychol.*, vol. 7, p. 956, 2016, doi: 10.3389/fpsyg.2016.00956.
- [33] A. J. Oldehinkel, F. C. Verhulst, and J. Ormel, "Low heart rate: a marker of stress resilience. The TRAILS study," *Biol. Psychiatry*, vol. 63, no. 12, pp. 1141-6, Jun 15 2008, doi: 10.1016/j.biopsych.2007.12.006.
- [34] S. H. Carson, J. B. Peterson, and D. M. Higgins, "Reliability, Validity, and Factor Structure of the Creative Achievement Questionnaire," *Creativity Research Journal*, vol. 17, no. 1, pp. 37-50, 2005, doi: 10.1207/s15326934crj1701\_4.
- [35] C. M. Cullum and G. J. Larrabee, Cullum, C. M., & Larrabee, G. J. (2010). *WAIS-IV use in neuropsychological assessment*. Academic Press., 2010.
- [36] R. Saan and B. Deelman, *De 15-Woordentests A en B. Een voorlopige handleiding (Intern rapport)*. Groningen: Department of Neuropsychology, University of Groningen, 1986.
- [37] B. Schmand, S. C. Groenink, and M. van den Dungen, "Letter fluency: psychometric properties and Dutch normative data," *Tijdschr. Gerontol. Geriatr.*, vol. 39, no. 2, pp. 64-76, Apr 2008, doi: 10.1007/BF03078128.
- [38] C. Webster-Stratton, M. J. Reid, and M. Hammond, "Preventing conduct problems, promoting social competence: a parent and teacher training partnership in head start," *J. Clin. Child Psychol.*, vol. 30, no. 3, pp. 283-302, Sep 2001, doi: 10.1207/S15374424JCCP3003\_2.
- [39] L. M. Brotman *et al.*, "Promoting effective parenting practices and preventing child behavior problems in school among ethnically diverse families from underserved, urban communities," *Child Dev.*, vol. 82, no. 1, pp. 258-76, Jan-Feb 2011, doi: 10.1111/j.1467-8624.2010.01554.x.
- [40] M. B. Drugli, B. Larsson, S. Fossum, and W. T. Mørch, "Five- to six-year outcome and its prediction for children with ODD/CD treated with parent training," *J. Child Psychol. Psychiatry*, vol. 51, no. 5, pp. 559-66, May 2010, doi: 10.1111/j.1469-7610.2009.02178.x.
